# Supplementary material
Source: Springer Nature journal article supplement (https://www.springermedizin.de/resource/supplementary/13058_2010_2759_MOESM3_ESM.pdf/9702094)

**(a) Luminal**

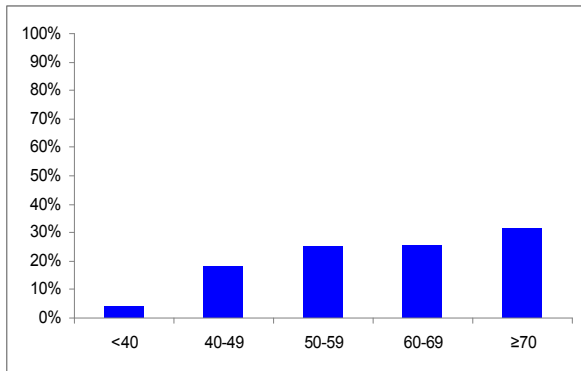

**(b) HER2-positive**

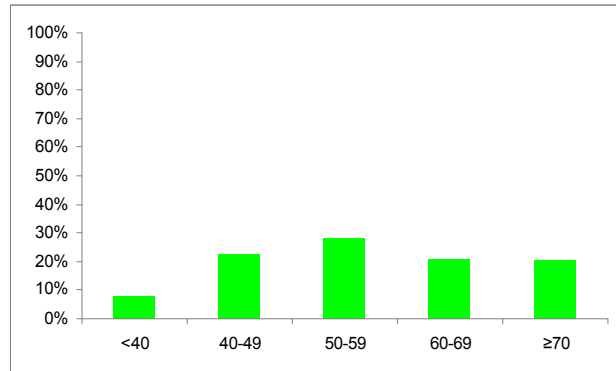

**(c) Triple-negative**

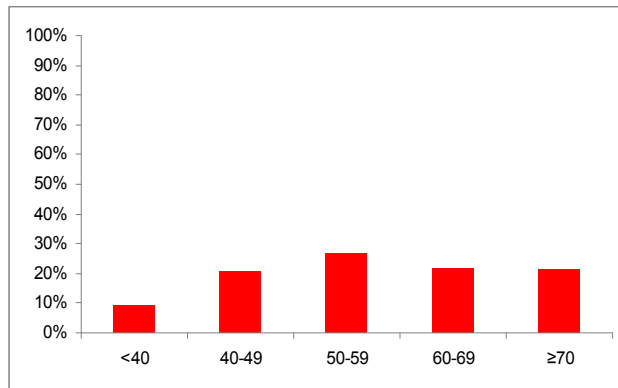

Supplement: MOESM3 [file 9702094]
